# Supplementary material
Source: PubMed Central journal article supplement (PMC6582379)
Supplement: Renati_et_al_Supplemental_table.pdf [file Renati_et_al_Supplemental_table.pdf]

Supplemental Table. Free thyroxine levels (T4) and atrial fibrillation detection in those with thyroid-stimulating hormone (TSH) greater than 4.20 mIU/L.

| Patients | TSH mIU/L | T4 ng/dl      | A Fib. Detected |
|----------|-----------|---------------|-----------------|
| 1        | 5.72      | 1.19          | No              |
| 2        | 7.68      | Not available | No              |
| 3        | 5.05      | 1.12          | Yes             |
| 4        | 5.05      | 1.13          | Yes             |
| 5        | 4.95      | 1.04          | No              |
| 6        | 4.62      | 1.13          | No              |
| 7        | 4.49      | 1.54          | Yes             |
| 8        | 5.38      | 1.16          | No              |
| 9        | 7.24      | 1.01          | No              |
| 10       | 4.49      | 1.56          | Yes             |
| 11       | 4.5       | 1.09          | Yes             |
| 12       | 8.77      | 1.18          | No              |
| 13       | 4.71      | 1.27          | Yes             |
